# Supplementary material
Source: bioRxiv or medRxiv preprint supplement (https://www.biorxiv.org/highwire/filestream/118949/field_highwire_adjunct_files/11/387316-4.pdf)

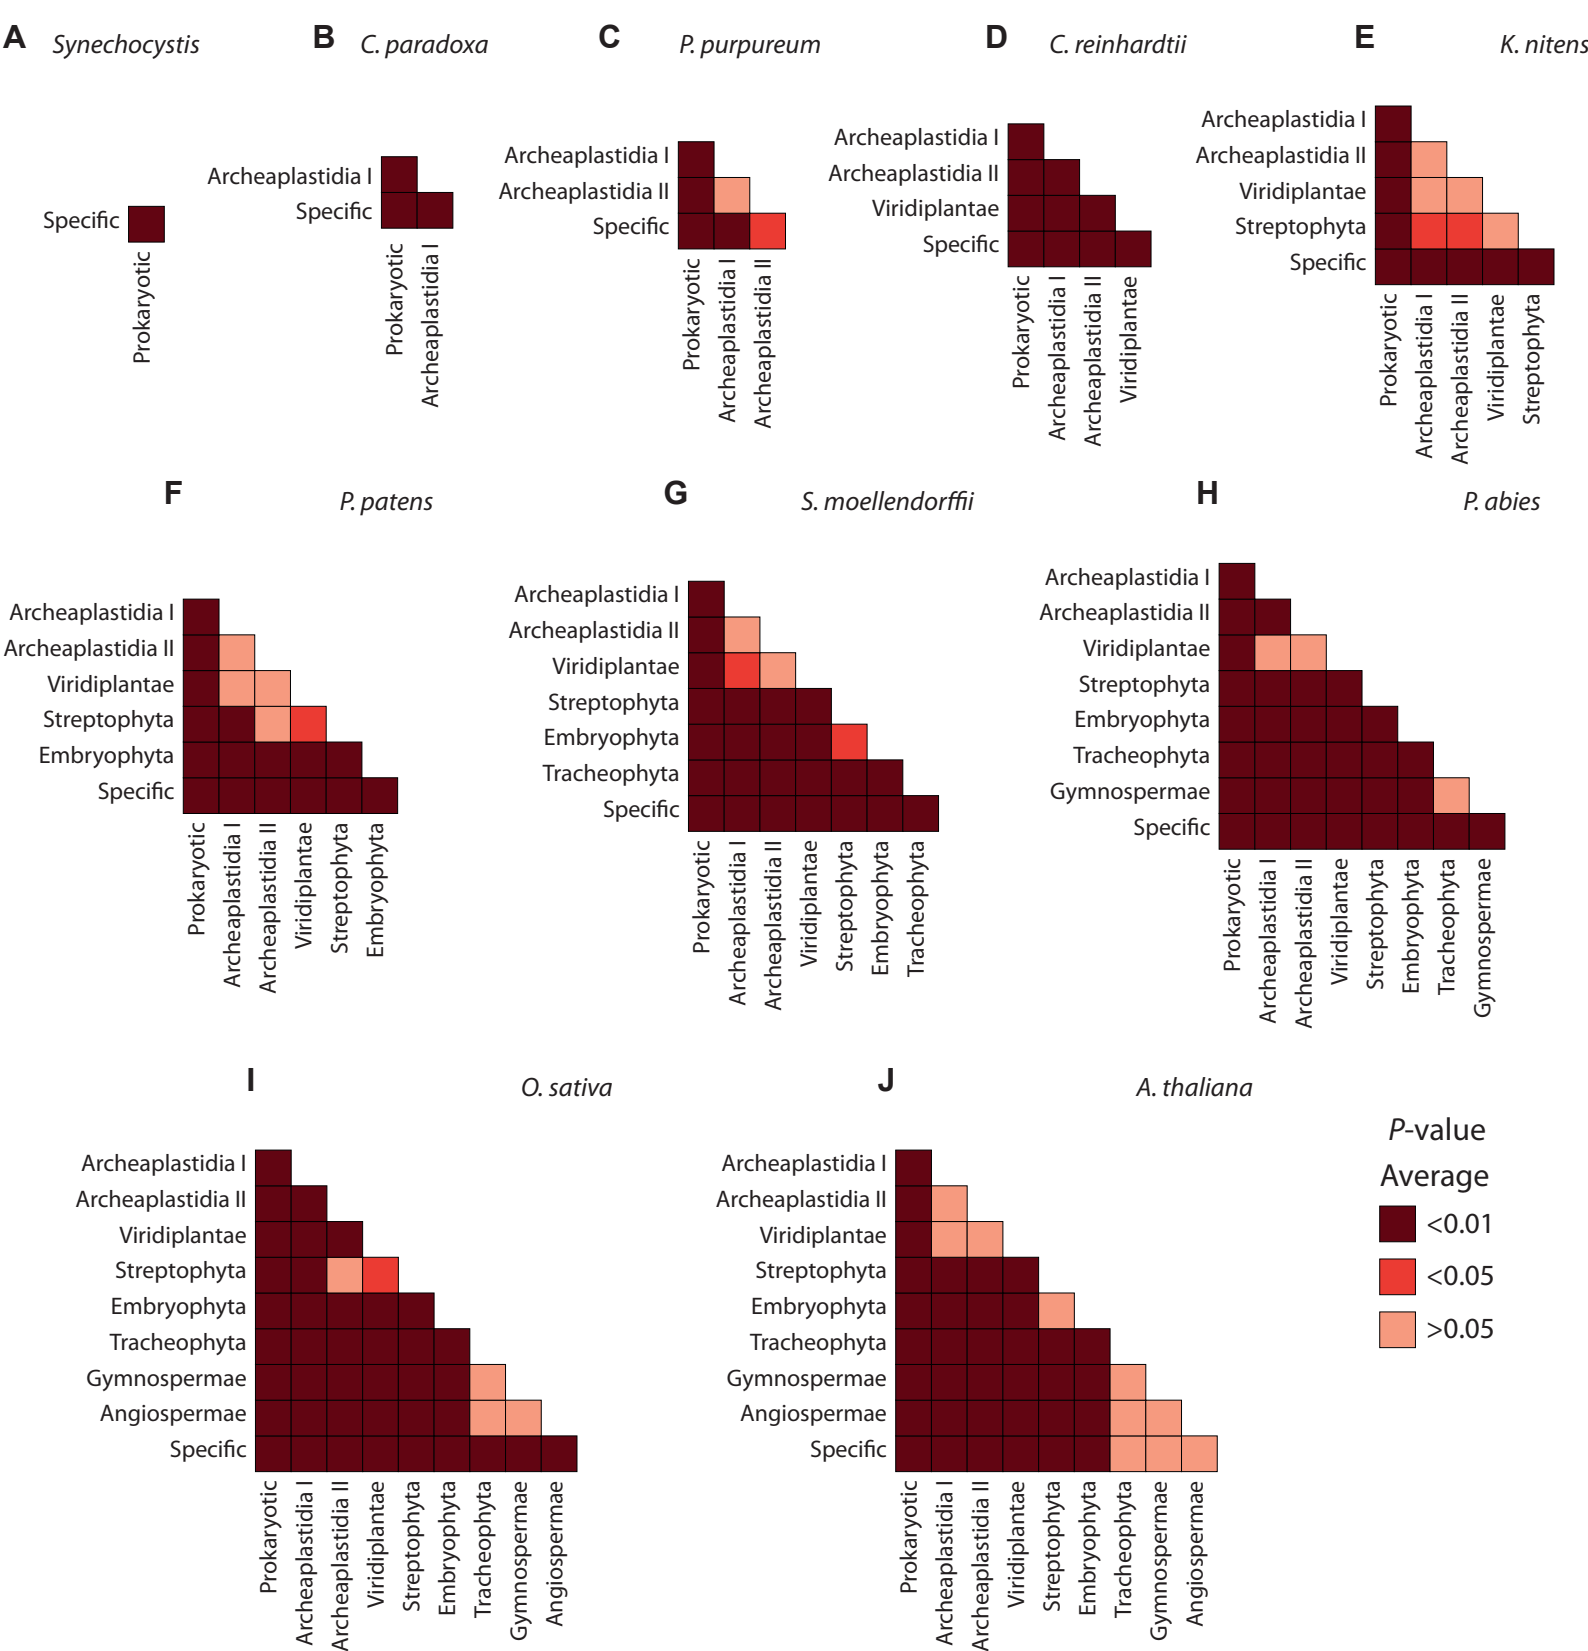

Supplement: Supplementary file [file 387316-4.pdf]
